# Supplementary material for: Obstructive Sleep Apnea and Incident Cancer: A Large Retrospective Multicenter Clinical Cohort Study
Source: Oxford University Press journal article supplement (doi:10.1158/1055-9965.epi-20-0975), 2020-12-02
Supplement: 10559965epi200975-sup-245786_2_supp_6705342_qjdzrs.docx [file 10559965epi200975-sup-245786_2_supp_6705342_qjdzrs.docx]

| **A** | **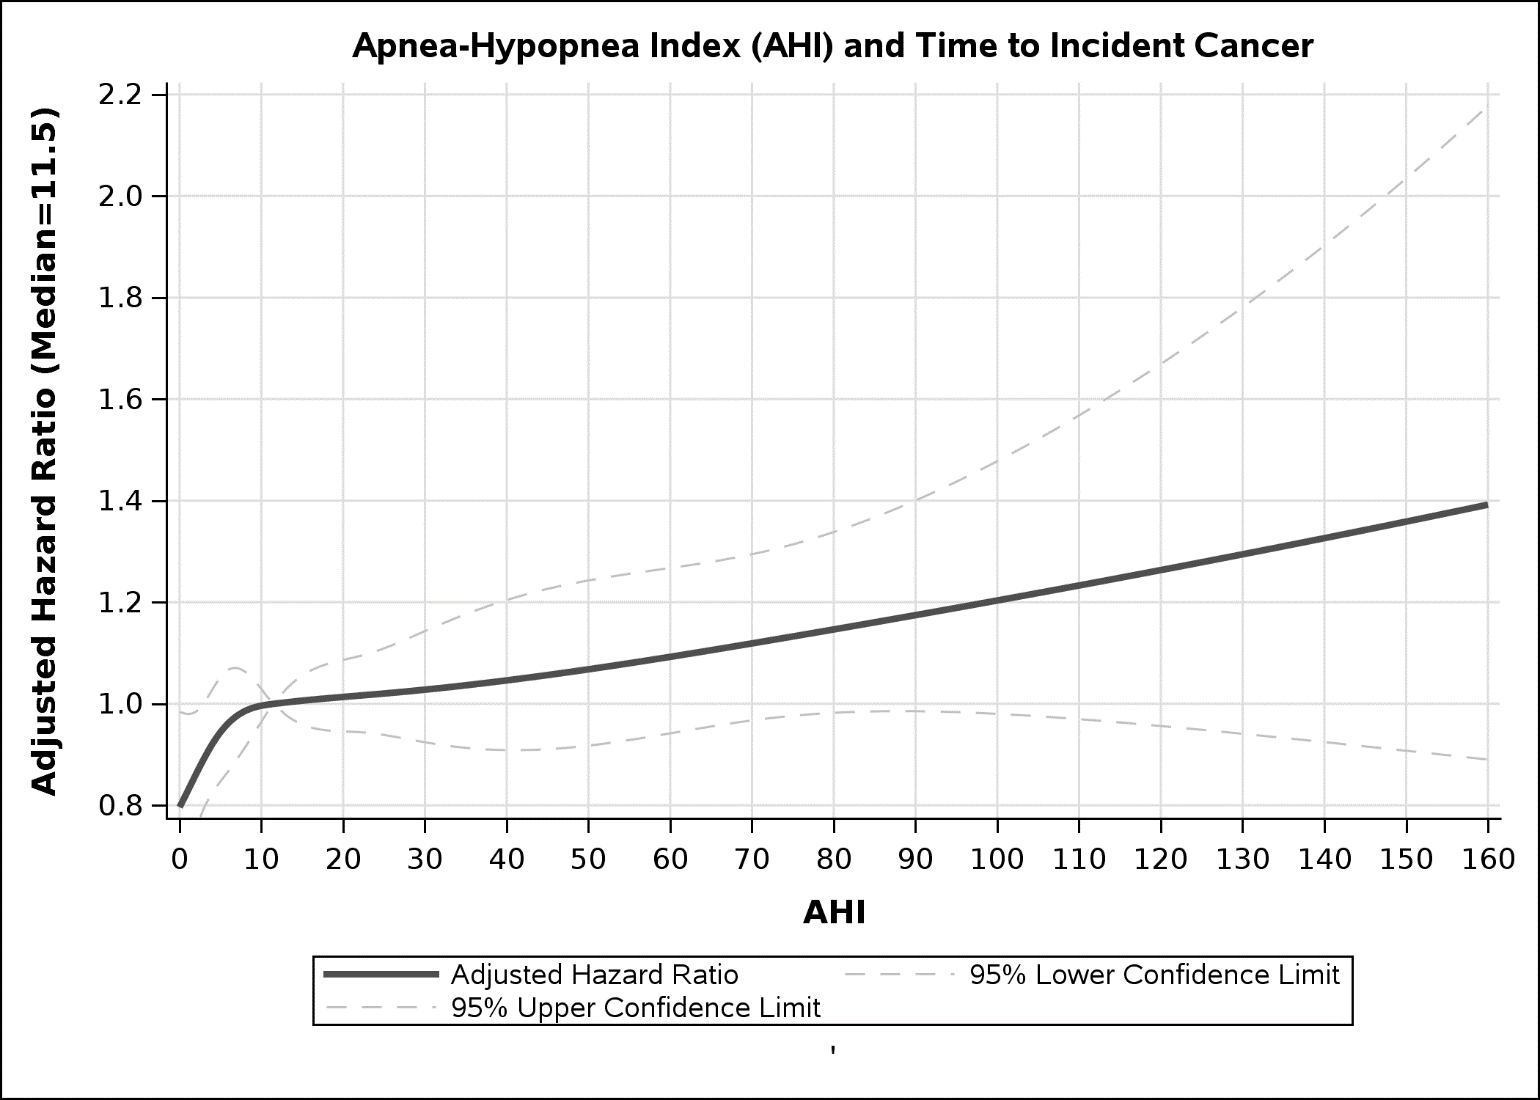** |
| --- | --- |
| **B** | **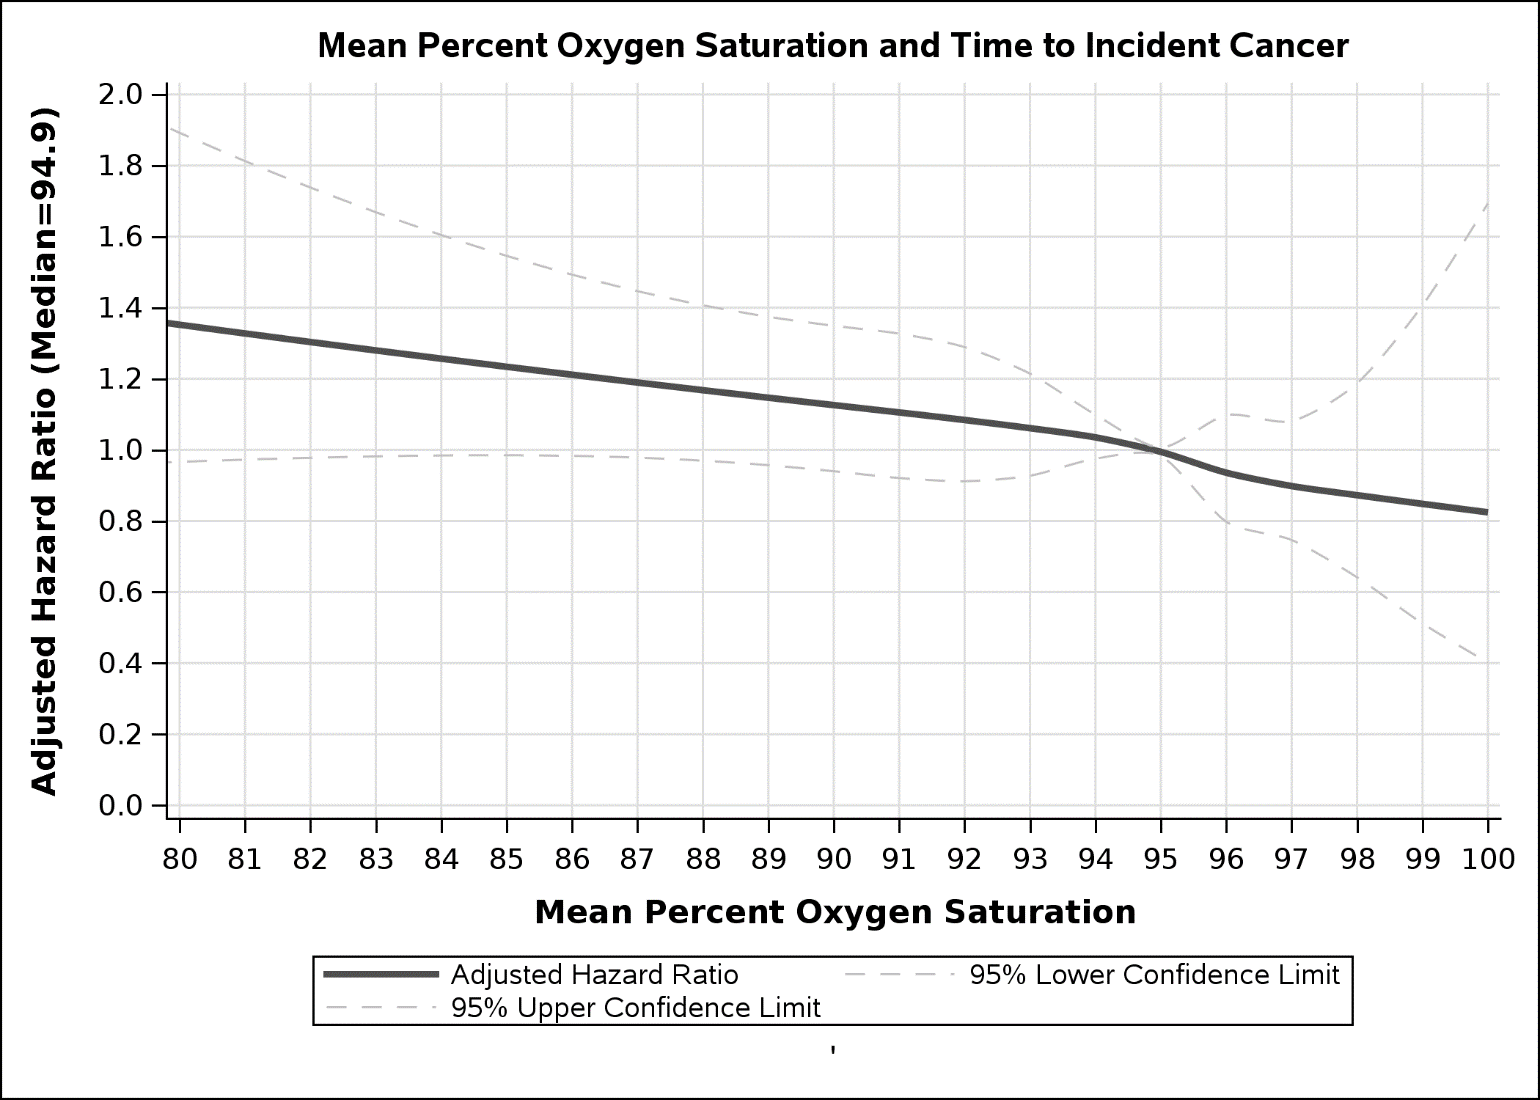** |
| **C** | **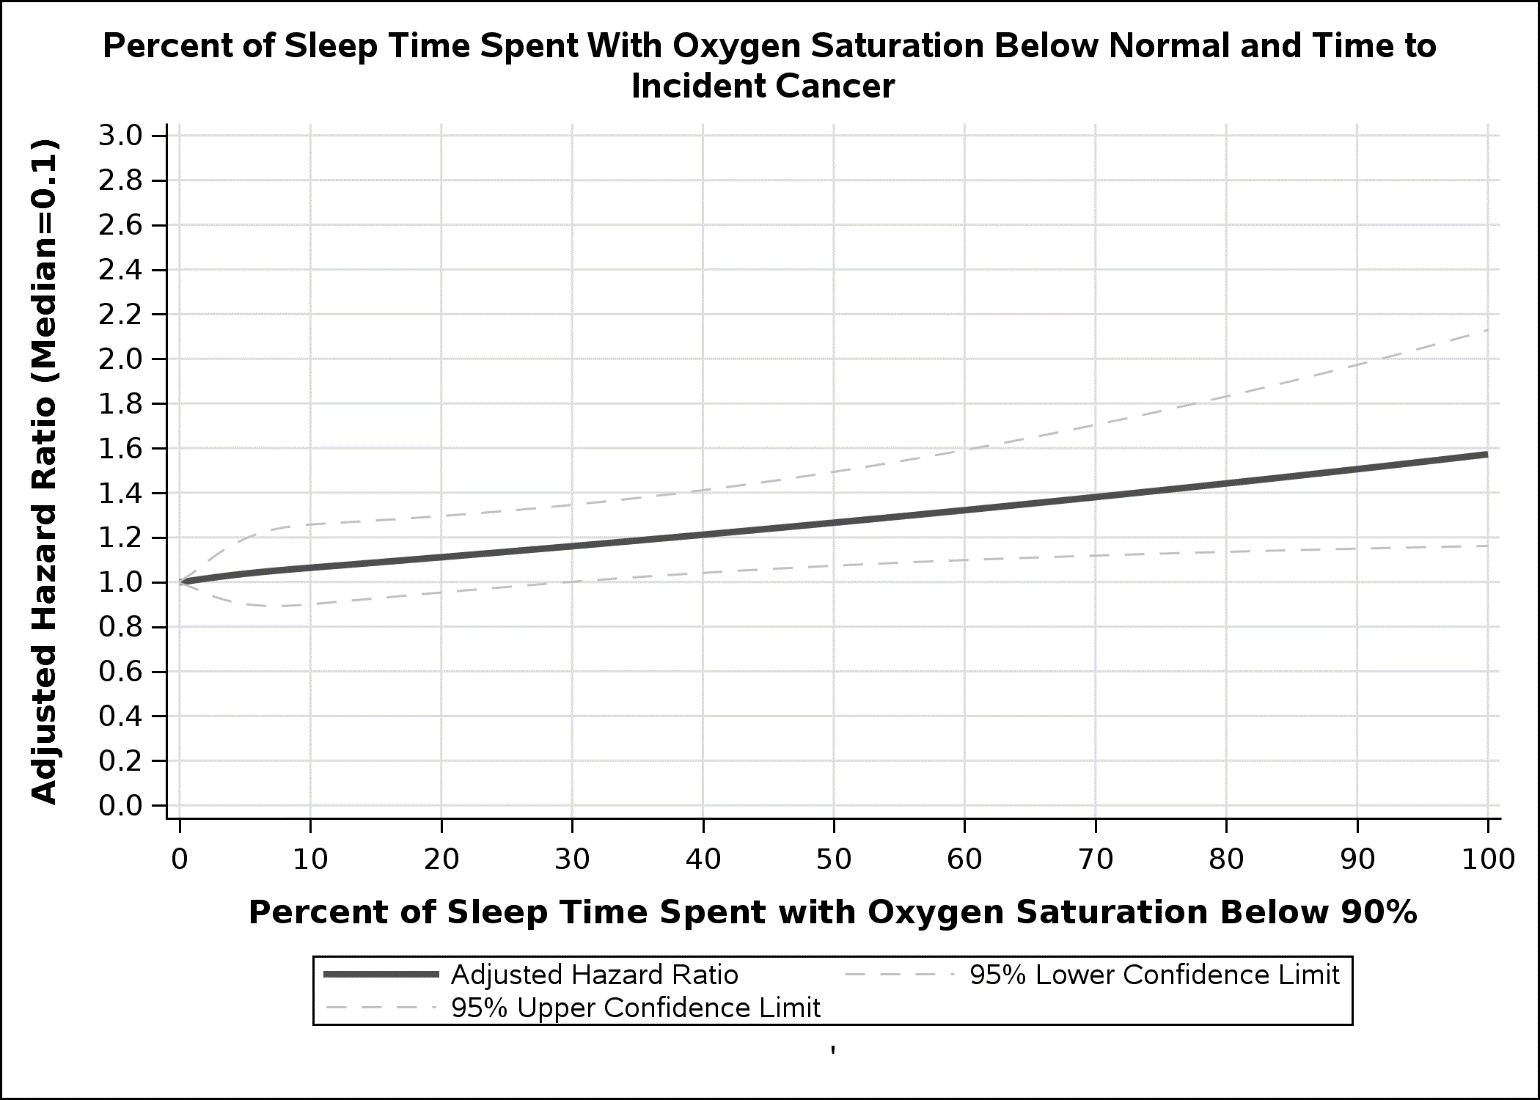** |

**Figure S4**. Dose-response relationship between obstructive sleep apnea (OSA) severity as measured by the apnea-hypopnea index (AHI) (A), the mean percent oxygen saturation (B), and the percent of sleep time spent with oxygen saturation below 90% (C) presented as adjusted hazard ratios (HRs) and 95% confidence interval with the median as a comparison group**.**
